# Supplementary material for: Construction and evaluation of a high-density SNP array for the Pacific oyster (Crassostrea gigas)
Source: PLoS One. 2017 Mar 22;12(3):e0174007. doi: 10.1371/journal.pone.0174007 (PMC5362100; doi:10.1371/journal.pone.0174007)
Supplement: S2 Dataset — (GZ) [file pone.0174007.s002.gz › S2_Dataset.txt]

SNPID	ConversionType
AX-165298355	NoMinorHom
AX-165306870	Other
AX-165318221	PolyHighResolution
AX-165318224	PolyHighResolution
AX-165318226	PolyHighResolution
AX-165318239	PolyHighResolution
AX-165318244	PolyHighResolution
AX-165318266	PolyHighResolution
AX-165318274	PolyHighResolution
AX-165318277	PolyHighResolution
AX-165318296	PolyHighResolution
AX-165318316	PolyHighResolution
AX-165318328	PolyHighResolution
AX-165318336	PolyHighResolution
AX-165318359	CallRateBelowThreshold
AX-165318368	NoMinorHom
AX-165318439	PolyHighResolution
AX-165318445	PolyHighResolution
AX-165318465	Other
AX-165318494	CallRateBelowThreshold
AX-165318538	PolyHighResolution
AX-165318572	PolyHighResolution
AX-165318577	PolyHighResolution
AX-165318594	CallRateBelowThreshold
AX-165318609	PolyHighResolution
AX-165318661	PolyHighResolution
AX-165318675	OTV
AX-165318682	NoMinorHom
AX-165318685	PolyHighResolution
AX-165318687	PolyHighResolution
AX-165318691	PolyHighResolution
AX-165318699	PolyHighResolution
AX-165318823	PolyHighResolution
AX-165318839	PolyHighResolution
AX-165318843	PolyHighResolution
AX-165318864	PolyHighResolution
AX-165318877	PolyHighResolution
AX-165318881	PolyHighResolution
AX-165318954	PolyHighResolution
AX-165319015	PolyHighResolution
AX-165319038	NoMinorHom
AX-165319091	PolyHighResolution
AX-165319103	PolyHighResolution
AX-165319106	PolyHighResolution
AX-165319112	PolyHighResolution
AX-165319131	PolyHighResolution
AX-165319151	PolyHighResolution
AX-168428759	NoMinorHom
AX-168428760	PolyHighResolution
AX-168428761	NoMinorHom
AX-168428762	NoMinorHom
AX-168428763	Other
AX-168428764	Other
AX-168428766	MonoHighResolution
AX-168428767	Other
AX-168428768	PolyHighResolution
AX-168428769	PolyHighResolution
AX-168428771	NoMinorHom
AX-168428772	PolyHighResolution
AX-168428773	NoMinorHom
AX-168428774	PolyHighResolution
AX-168428775	PolyHighResolution
AX-168428776	PolyHighResolution
AX-168428777	Other
AX-168428778	CallRateBelowThreshold
AX-168428780	PolyHighResolution
AX-168428781	PolyHighResolution
AX-168428782	PolyHighResolution
AX-168428783	PolyHighResolution
AX-168428784	PolyHighResolution
AX-168428785	PolyHighResolution
AX-168428786	PolyHighResolution
AX-168428787	PolyHighResolution
AX-168428789	PolyHighResolution
AX-168428790	PolyHighResolution
AX-168428791	CallRateBelowThreshold
AX-168428792	PolyHighResolution
AX-168428793	MonoHighResolution
AX-168428794	NoMinorHom
AX-168428795	PolyHighResolution
AX-168428796	PolyHighResolution
AX-168428797	PolyHighResolution
AX-168428798	PolyHighResolution
AX-168428799	PolyHighResolution
AX-168428801	PolyHighResolution
AX-168428802	PolyHighResolution
AX-168428803	PolyHighResolution
AX-168428804	PolyHighResolution
AX-168428805	PolyHighResolution
AX-168428806	PolyHighResolution
AX-168428807	NoMinorHom
AX-168428808	NoMinorHom
AX-168428809	PolyHighResolution
AX-168428810	PolyHighResolution
AX-168428811	Other
AX-168428812	PolyHighResolution
AX-168428814	PolyHighResolution
AX-168428815	OTV
AX-168428816	Other
AX-168428817	PolyHighResolution
AX-168428818	PolyHighResolution
AX-168428819	NoMinorHom
AX-168428820	Other
AX-168428821	CallRateBelowThreshold
AX-168428822	PolyHighResolution
AX-168428823	PolyHighResolution
AX-168428824	NoMinorHom
AX-168428825	PolyHighResolution
AX-168428826	PolyHighResolution
AX-168428827	PolyHighResolution
AX-168428828	NoMinorHom
AX-168428829	PolyHighResolution
AX-168428830	PolyHighResolution
AX-168428832	PolyHighResolution
AX-168428833	NoMinorHom
AX-168428834	PolyHighResolution
AX-168428835	PolyHighResolution
AX-168428836	CallRateBelowThreshold
AX-168428837	Other
AX-168428839	PolyHighResolution
AX-168428840	PolyHighResolution
AX-168428841	NoMinorHom
AX-168428842	MonoHighResolution
AX-168428843	Other
AX-168428844	Other
AX-168428845	Other
AX-168428846	Other
AX-168428847	NoMinorHom
AX-168428848	NoMinorHom
AX-168428849	MonoHighResolution
AX-168428850	Other
AX-168428851	MonoHighResolution
AX-168428852	Other
AX-168428853	Other
AX-168428854	CallRateBelowThreshold
AX-168428855	MonoHighResolution
AX-168428856	MonoHighResolution
AX-168428857	Other
AX-168428858	PolyHighResolution
AX-168428859	CallRateBelowThreshold
AX-168428860	PolyHighResolution
AX-168428861	PolyHighResolution
AX-168428862	NoMinorHom
AX-168428863	NoMinorHom
AX-168428864	OTV
AX-168428865	Other
AX-168428866	PolyHighResolution
AX-168428867	PolyHighResolution
AX-168428868	NoMinorHom
AX-168428869	CallRateBelowThreshold
AX-168428870	PolyHighResolution
AX-168428871	CallRateBelowThreshold
AX-168428872	PolyHighResolution
AX-168428873	PolyHighResolution
AX-168428874	Other
AX-168428875	Other
AX-168428877	PolyHighResolution
AX-168428878	PolyHighResolution
AX-168428879	NoMinorHom
AX-168428880	NoMinorHom
AX-168428882	PolyHighResolution
AX-168428883	NoMinorHom
AX-168428884	PolyHighResolution
AX-168428885	PolyHighResolution
AX-168428886	PolyHighResolution
AX-168428887	PolyHighResolution
AX-168428888	PolyHighResolution
AX-168428889	Other
AX-168428890	PolyHighResolution
AX-168428892	PolyHighResolution
AX-168428893	PolyHighResolution
AX-168428894	Other
AX-168428895	Other
AX-168428896	CallRateBelowThreshold
AX-168428897	PolyHighResolution
AX-168428898	PolyHighResolution
AX-168428899	NoMinorHom
AX-168428900	OTV
AX-168428902	PolyHighResolution
AX-168428903	PolyHighResolution
AX-168428904	PolyHighResolution
AX-168428905	PolyHighResolution
AX-168428906	NoMinorHom
AX-168428907	PolyHighResolution
AX-168428908	CallRateBelowThreshold
AX-168428909	PolyHighResolution
AX-168428910	PolyHighResolution
AX-168428911	NoMinorHom
AX-168428912	PolyHighResolution
AX-168428913	Other
AX-168428914	CallRateBelowThreshold
AX-168428915	NoMinorHom
AX-168428916	PolyHighResolution
AX-168428917	CallRateBelowThreshold
AX-168428918	Other
AX-168428919	CallRateBelowThreshold
AX-168428920	PolyHighResolution
AX-168428921	NoMinorHom
AX-168428922	NoMinorHom
AX-168428923	PolyHighResolution
AX-168428925	Other
AX-168428926	Other
AX-168428927	PolyHighResolution
AX-168428928	PolyHighResolution
AX-168428929	CallRateBelowThreshold
AX-168428930	PolyHighResolution
AX-168428931	Other
AX-168428932	Other
AX-168428933	PolyHighResolution
AX-168428934	MonoHighResolution
AX-168428935	OTV
AX-168428936	PolyHighResolution
AX-168428937	CallRateBelowThreshold
AX-168428938	Other
AX-168428939	PolyHighResolution
AX-168428940	PolyHighResolution
AX-168428941	PolyHighResolution
AX-168428942	PolyHighResolution
AX-168428944	PolyHighResolution
AX-168428945	PolyHighResolution
AX-168428946	NoMinorHom
AX-168428947	Other
AX-168428948	MonoHighResolution
AX-168428949	PolyHighResolution
AX-168428950	MonoHighResolution
AX-168428951	Other
AX-168428952	Other
AX-168428953	MonoHighResolution
AX-168428954	Other
AX-168428955	Other
AX-168428956	Other
AX-168428957	Other
AX-168428959	CallRateBelowThreshold
AX-168428960	CallRateBelowThreshold
AX-168428961	OTV
AX-168428962	Other
AX-168428963	CallRateBelowThreshold
AX-168428964	Other
AX-168428965	PolyHighResolution
AX-168428966	PolyHighResolution
AX-168428967	PolyHighResolution
AX-168428968	CallRateBelowThreshold
AX-168428969	NoMinorHom
AX-168428971	PolyHighResolution
AX-168428972	PolyHighResolution
AX-168428973	PolyHighResolution
AX-168428974	PolyHighResolution
AX-168428975	PolyHighResolution
AX-168428976	PolyHighResolution
AX-168428978	NoMinorHom
AX-168428979	NoMinorHom
AX-168428980	PolyHighResolution
AX-168428981	Other
AX-168428982	PolyHighResolution
AX-168428983	Other
AX-168428984	PolyHighResolution
AX-168428985	MonoHighResolution
AX-168428987	CallRateBelowThreshold
AX-168428989	PolyHighResolution
AX-168428990	Other
AX-168428991	Other
AX-168428992	Other
AX-168428993	Other
AX-168428994	Other
AX-168428995	CallRateBelowThreshold
AX-168428996	Other
AX-168428997	NoMinorHom
AX-168428998	Other
AX-168428999	PolyHighResolution
AX-168429000	CallRateBelowThreshold
AX-168429001	CallRateBelowThreshold
AX-168429002	Other
AX-168429004	Other
AX-168429005	PolyHighResolution
AX-168429006	Other
AX-168429007	Other
AX-168429008	PolyHighResolution
AX-168429009	Other
AX-168429010	Other
AX-168429011	Other
AX-168429012	Other
AX-168429013	PolyHighResolution
AX-168429014	PolyHighResolution
AX-168429015	OTV
AX-168429016	NoMinorHom
AX-168429017	CallRateBelowThreshold
AX-168429019	Other
AX-168429020	Other
AX-168429021	Other
AX-168429022	PolyHighResolution
AX-168429023	Other
AX-168429024	NoMinorHom
AX-168429025	CallRateBelowThreshold
AX-168429026	NoMinorHom
AX-168429027	CallRateBelowThreshold
AX-168429028	PolyHighResolution
AX-168429029	Other
AX-168429030	Other
AX-168429031	Other
AX-168429033	NoMinorHom
AX-168429035	PolyHighResolution
AX-168429036	PolyHighResolution
AX-168429037	PolyHighResolution
AX-168429040	PolyHighResolution
AX-168429041	PolyHighResolution
AX-168429042	PolyHighResolution
AX-168429043	Other
AX-168429044	PolyHighResolution
AX-168429045	OTV
AX-168429046	PolyHighResolution
AX-168429047	Other
AX-168429048	OTV
AX-168429049	CallRateBelowThreshold
AX-168429050	Other
AX-168429051	CallRateBelowThreshold
AX-168429052	PolyHighResolution
AX-168429053	PolyHighResolution
AX-168429054	PolyHighResolution
AX-168429055	PolyHighResolution
AX-168429056	CallRateBelowThreshold
AX-168429057	NoMinorHom
AX-168429058	CallRateBelowThreshold
AX-168429059	NoMinorHom
AX-168429060	Other
AX-168429061	Other
AX-168429062	NoMinorHom
AX-168429064	MonoHighResolution
AX-168429065	Other
AX-168429066	Other
AX-168429067	Other
AX-168429068	MonoHighResolution
AX-168429069	MonoHighResolution
AX-168429070	MonoHighResolution
AX-168429071	Other
AX-168429072	Other
AX-168429073	CallRateBelowThreshold
AX-168429074	CallRateBelowThreshold
AX-168429075	PolyHighResolution
AX-168429076	Other
AX-168429077	PolyHighResolution
AX-168429078	PolyHighResolution
AX-168429079	Other
AX-168429080	PolyHighResolution
AX-168429081	PolyHighResolution
AX-168429082	PolyHighResolution
AX-168429083	CallRateBelowThreshold
AX-168429084	Other
AX-168429085	CallRateBelowThreshold
AX-168429086	PolyHighResolution
AX-168429087	PolyHighResolution
AX-168429088	CallRateBelowThreshold
AX-168429089	Other
AX-168429091	NoMinorHom
AX-168429092	NoMinorHom
AX-168429093	Other
AX-168429094	PolyHighResolution
AX-168429095	PolyHighResolution
AX-168429097	CallRateBelowThreshold
AX-168429098	PolyHighResolution
AX-168429099	PolyHighResolution
AX-168429100	PolyHighResolution
AX-168429101	PolyHighResolution
AX-168429102	NoMinorHom
AX-168429103	Other
AX-168429104	NoMinorHom
AX-168429105	PolyHighResolution
AX-168429106	PolyHighResolution
AX-168429107	PolyHighResolution
AX-168429108	PolyHighResolution
AX-168429109	PolyHighResolution
AX-168429110	PolyHighResolution
AX-168429111	PolyHighResolution
AX-168429112	PolyHighResolution
AX-168429113	PolyHighResolution
AX-168429115	PolyHighResolution
AX-168429117	PolyHighResolution
AX-168429118	PolyHighResolution
AX-168429119	PolyHighResolution
AX-168429120	PolyHighResolution
AX-168429121	PolyHighResolution
AX-168429122	NoMinorHom
AX-168429123	PolyHighResolution
AX-168429124	PolyHighResolution
AX-168429125	Other
AX-168429126	PolyHighResolution
AX-168429127	NoMinorHom
AX-168429128	PolyHighResolution
AX-168429130	NoMinorHom
AX-168429131	Other
AX-168429134	PolyHighResolution
AX-168429135	NoMinorHom
AX-168429137	PolyHighResolution
AX-168429138	PolyHighResolution
AX-168429139	PolyHighResolution
AX-168429140	PolyHighResolution
AX-168429141	NoMinorHom
AX-168429143	NoMinorHom
AX-168429144	PolyHighResolution
AX-168429145	PolyHighResolution
AX-168429146	PolyHighResolution
AX-168429148	NoMinorHom
AX-168429149	PolyHighResolution
AX-168429150	CallRateBelowThreshold
AX-168429151	PolyHighResolution
AX-168429152	PolyHighResolution
AX-168429153	PolyHighResolution
AX-168429154	CallRateBelowThreshold
AX-168429155	PolyHighResolution
AX-168429156	CallRateBelowThreshold
AX-168429158	PolyHighResolution
AX-168429159	PolyHighResolution
AX-168429160	PolyHighResolution
AX-168429161	OTV
AX-168429162	CallRateBelowThreshold
AX-168429163	PolyHighResolution
AX-168429164	PolyHighResolution
AX-168429165	PolyHighResolution
AX-168429166	PolyHighResolution
AX-168429167	CallRateBelowThreshold
AX-168429168	NoMinorHom
AX-168429169	Other
AX-168429171	PolyHighResolution
AX-168429172	PolyHighResolution
AX-168429173	PolyHighResolution
AX-168429174	PolyHighResolution
AX-168429175	Other
AX-168429176	PolyHighResolution
AX-168429177	PolyHighResolution
AX-168429178	PolyHighResolution
AX-168429179	NoMinorHom
AX-168429180	PolyHighResolution
AX-168429181	CallRateBelowThreshold
AX-168429182	PolyHighResolution
AX-168429183	CallRateBelowThreshold
AX-168429184	PolyHighResolution
AX-168429185	PolyHighResolution
AX-168429186	CallRateBelowThreshold
AX-168429187	PolyHighResolution
AX-168429188	PolyHighResolution
AX-168429189	PolyHighResolution
AX-168429190	PolyHighResolution
AX-168429191	PolyHighResolution
AX-168429192	PolyHighResolution
AX-168429193	CallRateBelowThreshold
AX-168429194	CallRateBelowThreshold
AX-168429195	PolyHighResolution
AX-168429196	PolyHighResolution
AX-168429198	CallRateBelowThreshold
AX-168429199	PolyHighResolution
AX-168429200	PolyHighResolution
AX-168429201	PolyHighResolution
AX-168429202	PolyHighResolution
AX-168429204	PolyHighResolution
AX-168429205	PolyHighResolution
AX-168429206	Other
AX-168429208	PolyHighResolution
AX-168429209	Other
AX-168429210	Other
AX-168429211	Other
AX-168429213	CallRateBelowThreshold
AX-168429214	Other
AX-168429215	MonoHighResolution
AX-168429216	PolyHighResolution
AX-168429217	PolyHighResolution
AX-168429218	PolyHighResolution
AX-168429219	CallRateBelowThreshold
AX-168429220	Other
AX-168429221	NoMinorHom
AX-168429222	PolyHighResolution
AX-168429223	PolyHighResolution
AX-168429225	PolyHighResolution
AX-168429226	PolyHighResolution
AX-168429227	NoMinorHom
AX-168429228	Other
AX-168429229	NoMinorHom
AX-168429230	PolyHighResolution
AX-168429232	PolyHighResolution
AX-168429233	PolyHighResolution
AX-168429234	PolyHighResolution
AX-168429235	PolyHighResolution
AX-168429236	PolyHighResolution
AX-168429237	PolyHighResolution
AX-168429238	PolyHighResolution
AX-168429239	PolyHighResolution
AX-168429240	Other
AX-168429241	NoMinorHom
AX-168429242	Other
AX-168429243	Other
AX-168429244	PolyHighResolution
AX-168429245	NoMinorHom
AX-168429246	NoMinorHom
AX-168429247	NoMinorHom
AX-168429249	CallRateBelowThreshold
AX-168429250	Other
AX-168429251	PolyHighResolution
AX-168429252	Other
AX-168429253	PolyHighResolution
AX-168429255	MonoHighResolution
AX-168429256	Other
AX-168429257	PolyHighResolution
AX-168429259	PolyHighResolution
AX-168429260	PolyHighResolution
AX-168429262	NoMinorHom
AX-168429263	Other
AX-168429264	OTV
AX-168429265	OTV
AX-168429266	Other
AX-168429267	NoMinorHom
AX-168429269	PolyHighResolution
AX-168429270	PolyHighResolution
AX-168429271	MonoHighResolution
AX-168429272	PolyHighResolution
AX-168429273	PolyHighResolution
AX-168429274	PolyHighResolution
AX-168429275	PolyHighResolution
AX-168429276	Other
AX-168429278	PolyHighResolution
AX-168429279	PolyHighResolution
AX-168429280	PolyHighResolution
AX-168429281	PolyHighResolution
AX-168429282	PolyHighResolution
AX-168429283	PolyHighResolution
AX-168429284	NoMinorHom
AX-168429285	PolyHighResolution
AX-168429286	NoMinorHom
AX-168429287	PolyHighResolution
AX-168429288	Other
AX-168429289	PolyHighResolution
AX-168429290	PolyHighResolution
AX-168429291	PolyHighResolution
AX-168429292	PolyHighResolution
AX-168429294	PolyHighResolution
AX-168429297	PolyHighResolution
AX-168429298	NoMinorHom
AX-168429299	PolyHighResolution
AX-168429300	Other
AX-168429301	PolyHighResolution
AX-168429302	PolyHighResolution
AX-168429303	Other
AX-168429306	PolyHighResolution
AX-168429307	PolyHighResolution
AX-168429308	PolyHighResolution
AX-168429309	CallRateBelowThreshold
AX-168429311	PolyHighResolution
AX-168429312	Other
AX-168429313	PolyHighResolution
AX-168429314	PolyHighResolution
AX-168429315	NoMinorHom
AX-168429316	PolyHighResolution
AX-168429317	PolyHighResolution
AX-168429318	PolyHighResolution
AX-168429319	PolyHighResolution
AX-168429320	PolyHighResolution
AX-168429321	CallRateBelowThreshold
AX-168429322	PolyHighResolution
AX-168429324	PolyHighResolution
AX-168429325	PolyHighResolution
AX-168429326	NoMinorHom
AX-168429327	NoMinorHom
AX-168429328	Other
AX-168429329	PolyHighResolution
AX-168429330	PolyHighResolution
AX-168429331	NoMinorHom
AX-168429332	NoMinorHom
AX-168429333	PolyHighResolution
AX-168429334	PolyHighResolution
AX-168429335	PolyHighResolution
AX-168429336	NoMinorHom
AX-168429337	Other
AX-168429338	PolyHighResolution
AX-168429339	NoMinorHom
AX-168429340	Other
AX-168429341	CallRateBelowThreshold
AX-168429342	Other
AX-168429343	PolyHighResolution
AX-168429344	Other
AX-168429345	Other
AX-168429346	NoMinorHom
AX-168429347	Other
AX-168429348	Other
AX-168429349	NoMinorHom
AX-168429350	MonoHighResolution
AX-168429351	Other
AX-168429352	Other
AX-168429353	Other
AX-168429354	PolyHighResolution
AX-168429355	PolyHighResolution
AX-168429356	PolyHighResolution
AX-168429357	Other
AX-168429358	CallRateBelowThreshold
AX-168429359	CallRateBelowThreshold
AX-168429360	PolyHighResolution
AX-168429361	PolyHighResolution
AX-168429362	CallRateBelowThreshold
AX-168429363	Other
AX-168429364	NoMinorHom
AX-168429365	Other
AX-168429366	PolyHighResolution
AX-168429367	PolyHighResolution
AX-168429368	PolyHighResolution
AX-168429369	Other
AX-168429370	PolyHighResolution
AX-168429371	Other
AX-168429372	PolyHighResolution
AX-168429373	PolyHighResolution
AX-168429375	PolyHighResolution
AX-168429376	PolyHighResolution
AX-168429377	PolyHighResolution
AX-168429378	NoMinorHom
AX-168429379	Other
AX-168429380	MonoHighResolution
AX-168429381	PolyHighResolution
AX-168429382	PolyHighResolution
AX-168429384	PolyHighResolution
AX-168429385	Other
AX-168429386	CallRateBelowThreshold
AX-168429387	Other
AX-168429388	PolyHighResolution
AX-168429389	PolyHighResolution
AX-168429390	NoMinorHom
AX-168429392	NoMinorHom
AX-168429393	CallRateBelowThreshold
AX-168429394	Other
AX-168429395	Other
AX-168429396	PolyHighResolution
AX-168429397	NoMinorHom
AX-168429398	PolyHighResolution
AX-168429399	PolyHighResolution
AX-168429400	Other
AX-168429401	PolyHighResolution
AX-168429403	PolyHighResolution
AX-168429404	PolyHighResolution
AX-168429405	NoMinorHom
AX-168429406	CallRateBelowThreshold
AX-168429407	PolyHighResolution
AX-168429408	Other
AX-168429409	NoMinorHom
AX-168429410	NoMinorHom
AX-168429411	PolyHighResolution
AX-168429412	PolyHighResolution
AX-168429413	CallRateBelowThreshold
AX-168429414	Other
AX-168429415	PolyHighResolution
AX-168429416	Other
AX-168429417	CallRateBelowThreshold
AX-168429418	Other
AX-168429419	Other
AX-168429420	OTV
AX-168429421	Other
AX-168429422	PolyHighResolution
AX-168429423	PolyHighResolution
AX-168429424	NoMinorHom
AX-168429425	PolyHighResolution
AX-168429426	NoMinorHom
AX-168429427	PolyHighResolution
AX-168429428	PolyHighResolution
AX-168429429	PolyHighResolution
AX-168429430	CallRateBelowThreshold
AX-168429431	PolyHighResolution
AX-168429433	NoMinorHom
AX-168429434	PolyHighResolution
AX-168429435	PolyHighResolution
AX-168429436	Other
AX-168429437	PolyHighResolution
AX-168429438	NoMinorHom
AX-168429439	PolyHighResolution
AX-168429440	PolyHighResolution
AX-168429441	MonoHighResolution
AX-168429442	PolyHighResolution
AX-168429443	Other
AX-168429444	PolyHighResolution
AX-168429445	Other
AX-168429446	Other
AX-168429447	PolyHighResolution
AX-168429448	PolyHighResolution
AX-168429449	MonoHighResolution
AX-168429450	CallRateBelowThreshold
AX-168429451	PolyHighResolution
AX-168429452	PolyHighResolution
AX-168429453	PolyHighResolution
AX-168429455	CallRateBelowThreshold
AX-168429456	NoMinorHom
AX-168429457	Other
AX-168429458	Other
AX-168429459	PolyHighResolution
AX-168429460	PolyHighResolution
AX-168429461	PolyHighResolution
AX-168429462	PolyHighResolution
AX-168429463	Other
AX-168429464	PolyHighResolution
AX-168429465	CallRateBelowThreshold
AX-168429467	MonoHighResolution
AX-168429468	CallRateBelowThreshold
AX-168429469	Other
AX-168429470	NoMinorHom
AX-168429471	NoMinorHom
AX-168429473	NoMinorHom
AX-168429474	PolyHighResolution
AX-168429475	PolyHighResolution
AX-168429476	PolyHighResolution
AX-168429477	Other
AX-168429478	Other
AX-168429479	NoMinorHom
AX-168429480	PolyHighResolution
AX-168429481	PolyHighResolution
AX-168429482	PolyHighResolution
AX-168429483	Other
AX-168429484	Other
AX-168429485	PolyHighResolution
AX-168429486	PolyHighResolution
AX-168429487	NoMinorHom
AX-168429488	PolyHighResolution
AX-168429489	PolyHighResolution
AX-168429490	PolyHighResolution
AX-168429491	PolyHighResolution
AX-168429492	PolyHighResolution
AX-168429493	NoMinorHom
AX-168429494	PolyHighResolution
AX-168429496	PolyHighResolution
AX-168429498	PolyHighResolution
AX-168429500	PolyHighResolution
AX-168429501	NoMinorHom
AX-168429502	PolyHighResolution
AX-168429503	PolyHighResolution
AX-168429504	NoMinorHom
AX-168429505	PolyHighResolution
AX-168429506	NoMinorHom
AX-168429507	Other
AX-168429508	PolyHighResolution
AX-168429510	PolyHighResolution
AX-168429511	PolyHighResolution
AX-168429512	NoMinorHom
AX-168429513	Other
AX-168429514	Other
AX-168429515	PolyHighResolution
AX-168429516	PolyHighResolution
AX-168429517	CallRateBelowThreshold
AX-168429518	PolyHighResolution
AX-168429519	PolyHighResolution
AX-168429520	PolyHighResolution
AX-168429521	MonoHighResolution
AX-168429523	PolyHighResolution
AX-168429524	PolyHighResolution
AX-168429526	PolyHighResolution
AX-168429527	PolyHighResolution
AX-168429528	PolyHighResolution
AX-168429529	NoMinorHom
AX-168429530	NoMinorHom
AX-168429531	PolyHighResolution
AX-168429532	PolyHighResolution
AX-168429533	PolyHighResolution
AX-168429534	NoMinorHom
AX-168429535	NoMinorHom
AX-168429536	PolyHighResolution
AX-168429537	PolyHighResolution
AX-168429538	CallRateBelowThreshold
AX-168429539	CallRateBelowThreshold
AX-168429540	PolyHighResolution
AX-168429541	NoMinorHom
AX-168429542	PolyHighResolution
AX-168429543	NoMinorHom
AX-168429544	PolyHighResolution
AX-168429545	NoMinorHom
AX-168429547	PolyHighResolution
AX-168429548	CallRateBelowThreshold
AX-168429550	PolyHighResolution
AX-168429552	PolyHighResolution
AX-168429553	PolyHighResolution
AX-168429555	Other
AX-168429557	NoMinorHom
AX-168429558	PolyHighResolution
AX-168429559	PolyHighResolution
AX-168429560	PolyHighResolution
AX-168429561	Other
AX-168429562	CallRateBelowThreshold
AX-168429563	OTV
AX-168429564	PolyHighResolution
AX-168429565	PolyHighResolution
AX-168429566	NoMinorHom
AX-168429567	NoMinorHom
AX-168429568	PolyHighResolution
AX-168429569	Other
AX-168429570	PolyHighResolution
AX-168429571	NoMinorHom
AX-168429573	PolyHighResolution
AX-168429574	NoMinorHom
AX-168429575	NoMinorHom
AX-168429576	PolyHighResolution
AX-168429577	NoMinorHom
AX-168429578	PolyHighResolution
AX-168429579	NoMinorHom
AX-168429581	PolyHighResolution
AX-168429582	Other
AX-168429583	NoMinorHom
AX-168429584	PolyHighResolution
AX-168429586	PolyHighResolution
AX-168429587	Other
AX-168429588	PolyHighResolution
AX-168429589	PolyHighResolution
AX-168429590	PolyHighResolution
AX-168429591	PolyHighResolution
AX-168429592	PolyHighResolution
AX-168429593	Other
AX-168429594	NoMinorHom
AX-168429595	PolyHighResolution
AX-168429596	PolyHighResolution
AX-168429597	PolyHighResolution
AX-168429598	PolyHighResolution
AX-168429599	PolyHighResolution
AX-168429600	Other
AX-168429601	PolyHighResolution
AX-168429602	PolyHighResolution
AX-168429603	PolyHighResolution
AX-168429604	PolyHighResolution
AX-168429605	NoMinorHom
AX-168429606	CallRateBelowThreshold
AX-168429607	PolyHighResolution
AX-168429609	PolyHighResolution
AX-168429611	CallRateBelowThreshold
AX-168429612	PolyHighResolution
AX-168429613	PolyHighResolution
AX-168429614	PolyHighResolution
AX-168429615	PolyHighResolution
AX-168429616	NoMinorHom
AX-168429618	PolyHighResolution
AX-168429619	Other
AX-168429620	PolyHighResolution
AX-168429621	NoMinorHom
AX-168429622	PolyHighResolution
AX-168429623	NoMinorHom
AX-168429624	Other
AX-168429625	Other
AX-168429626	PolyHighResolution
AX-168429627	PolyHighResolution
AX-168429628	PolyHighResolution
AX-168429630	PolyHighResolution
AX-168429631	NoMinorHom
AX-168429632	PolyHighResolution
AX-168429633	PolyHighResolution
AX-168429635	Other
AX-168429636	NoMinorHom
AX-168429637	PolyHighResolution
AX-168429638	PolyHighResolution
AX-168429639	PolyHighResolution
AX-168429640	PolyHighResolution
AX-168429641	Other
AX-168429642	NoMinorHom
AX-168429643	PolyHighResolution
AX-168429644	NoMinorHom
AX-168429645	PolyHighResolution
AX-168429646	PolyHighResolution
AX-168429647	NoMinorHom
AX-168429648	PolyHighResolution
AX-168429650	Other
AX-168429651	CallRateBelowThreshold
AX-168429652	Other
AX-168429653	CallRateBelowThreshold
AX-168429654	Other
AX-168429655	OTV
AX-168429656	Other
AX-168429657	NoMinorHom
AX-168429658	CallRateBelowThreshold
AX-168429659	PolyHighResolution
AX-168429660	Other
AX-168429661	PolyHighResolution
AX-168429662	PolyHighResolution
AX-168429663	NoMinorHom
AX-168429665	PolyHighResolution
AX-168429666	Other
AX-168429667	PolyHighResolution
AX-168429668	PolyHighResolution
AX-168429669	Other
AX-168429671	CallRateBelowThreshold
AX-168429672	NoMinorHom
AX-168429673	OTV
AX-168429674	PolyHighResolution
AX-168429675	CallRateBelowThreshold
AX-168429676	PolyHighResolution
AX-168429677	NoMinorHom
AX-168429678	PolyHighResolution
AX-168429679	PolyHighResolution
AX-168429680	PolyHighResolution
AX-168429681	OTV
AX-168429682	Other
AX-168429683	CallRateBelowThreshold
AX-168429684	CallRateBelowThreshold
AX-168429685	PolyHighResolution
AX-168429686	Other
AX-168429688	Other
AX-168429690	PolyHighResolution
AX-168429691	PolyHighResolution
AX-168429692	PolyHighResolution
AX-168429693	MonoHighResolution
AX-168429694	Other
AX-168429695	PolyHighResolution
AX-168429696	Other
AX-168429697	Other
AX-168429698	Other
AX-168429699	CallRateBelowThreshold
AX-168429700	Other
AX-168429701	Other
AX-168429702	OTV
AX-168429703	Other
AX-168429704	NoMinorHom
AX-168429705	Other
AX-168429706	Other
AX-168429707	Other
AX-168429708	CallRateBelowThreshold
AX-168429710	Other
AX-168429711	PolyHighResolution
AX-168429712	PolyHighResolution
AX-168429713	Other
AX-168429714	CallRateBelowThreshold
AX-168429716	NoMinorHom
AX-168429717	Other
AX-168429718	PolyHighResolution
AX-168429719	Other
AX-168429721	NoMinorHom
AX-168429722	PolyHighResolution
AX-168429723	OTV
AX-168429724	PolyHighResolution
AX-168429725	Other
AX-168429726	PolyHighResolution
AX-168429727	PolyHighResolution
AX-168429728	CallRateBelowThreshold
AX-168429729	PolyHighResolution
AX-168429730	PolyHighResolution
AX-168429731	PolyHighResolution
AX-168429732	Other
AX-168429733	PolyHighResolution
AX-168429734	Other
AX-168429735	PolyHighResolution
AX-168429736	PolyHighResolution
AX-168429737	PolyHighResolution
AX-168429738	NoMinorHom
AX-168429739	MonoHighResolution
AX-168429740	PolyHighResolution
AX-168429741	NoMinorHom
AX-168429743	NoMinorHom
AX-168429744	PolyHighResolution
AX-168429745	PolyHighResolution
AX-168429746	PolyHighResolution
AX-168429747	PolyHighResolution
AX-168429749	NoMinorHom
AX-168429750	PolyHighResolution
AX-168429751	PolyHighResolution
AX-168429752	PolyHighResolution
AX-168429753	Other
AX-168429754	PolyHighResolution
AX-168429755	PolyHighResolution
AX-168429756	PolyHighResolution
AX-168429757	NoMinorHom
AX-168429758	CallRateBelowThreshold
AX-168429759	PolyHighResolution
AX-168429760	PolyHighResolution
AX-168429761	NoMinorHom
AX-168429762	PolyHighResolution
AX-168429763	PolyHighResolution
AX-168429764	OTV
AX-168429765	Other
AX-168429766	OTV
AX-168429768	PolyHighResolution
AX-168429769	NoMinorHom
AX-168429771	PolyHighResolution
AX-168429772	PolyHighResolution
AX-168429773	Other
AX-168429774	CallRateBelowThreshold
AX-168429775	CallRateBelowThreshold
AX-168429776	PolyHighResolution
AX-168429778	PolyHighResolution
AX-168429779	PolyHighResolution
AX-168429781	PolyHighResolution
AX-168429782	PolyHighResolution
AX-168429783	PolyHighResolution
AX-168429784	PolyHighResolution
AX-168429785	PolyHighResolution
AX-168429786	PolyHighResolution
AX-168429787	PolyHighResolution
AX-168429788	PolyHighResolution
AX-168429789	CallRateBelowThreshold
AX-168429790	NoMinorHom
AX-168429791	PolyHighResolution
AX-168429792	PolyHighResolution
AX-168429793	PolyHighResolution
AX-168429794	Other
AX-168429795	PolyHighResolution
AX-168429796	PolyHighResolution
AX-168429797	PolyHighResolution
AX-168429798	PolyHighResolution
AX-168429799	PolyHighResolution
AX-168429800	PolyHighResolution
AX-168429801	PolyHighResolution
AX-168429802	PolyHighResolution
AX-168429803	PolyHighResolution
AX-168429804	PolyHighResolution
AX-168429806	PolyHighResolution
AX-168429807	PolyHighResolution
AX-168429809	Other
AX-168429810	PolyHighResolution
AX-168429811	PolyHighResolution
AX-168429812	PolyHighResolution
AX-168429813	CallRateBelowThreshold
AX-168429815	PolyHighResolution
AX-168429816	PolyHighResolution
AX-168429818	PolyHighResolution
AX-168429819	PolyHighResolution
AX-168429821	PolyHighResolution
AX-168429822	Other
AX-168429824	PolyHighResolution
AX-168429825	PolyHighResolution
AX-168429826	PolyHighResolution
AX-168429827	Other
AX-168429828	PolyHighResolution
AX-168429829	PolyHighResolution
AX-168429830	NoMinorHom
AX-168429831	PolyHighResolution
AX-168429832	PolyHighResolution
AX-168429833	PolyHighResolution
AX-168429834	MonoHighResolution
AX-168429835	NoMinorHom
AX-168429836	PolyHighResolution
AX-168429837	PolyHighResolution
AX-168429838	Other
AX-168429839	Other
AX-168429840	PolyHighResolution
AX-168429841	PolyHighResolution
AX-168429842	PolyHighResolution
AX-168429844	PolyHighResolution
AX-168429845	PolyHighResolution
AX-168429846	NoMinorHom
AX-168429847	PolyHighResolution
AX-168429848	Other
AX-168429849	Other
AX-168429850	PolyHighResolution
AX-168429851	NoMinorHom
AX-168429852	PolyHighResolution
AX-168429853	NoMinorHom
AX-168429854	Other
AX-168429855	PolyHighResolution
AX-168429856	PolyHighResolution
AX-168429857	PolyHighResolution
AX-168429858	CallRateBelowThreshold
AX-168429859	PolyHighResolution
AX-168429860	PolyHighResolution
AX-168429861	PolyHighResolution
AX-168429863	PolyHighResolution
AX-168429864	PolyHighResolution
AX-168429865	PolyHighResolution
AX-168429866	PolyHighResolution
AX-168429867	PolyHighResolution
AX-168429869	Other
AX-168429870	PolyHighResolution
AX-168429871	PolyHighResolution
AX-168429872	CallRateBelowThreshold
AX-168429874	PolyHighResolution
AX-168429875	PolyHighResolution
AX-168429876	Other
AX-168429877	PolyHighResolution
AX-168429878	PolyHighResolution
AX-168429879	PolyHighResolution
AX-168429880	NoMinorHom
AX-168429881	PolyHighResolution
AX-168429882	PolyHighResolution
AX-168429883	PolyHighResolution
AX-168429884	PolyHighResolution
AX-168429885	NoMinorHom
AX-168429886	PolyHighResolution
AX-168429887	CallRateBelowThreshold
AX-168429888	PolyHighResolution
AX-168429889	Other
AX-168429890	PolyHighResolution
AX-168429891	PolyHighResolution
AX-168429892	CallRateBelowThreshold
AX-168429893	NoMinorHom
AX-168429894	NoMinorHom
AX-168429895	CallRateBelowThreshold
AX-168429896	PolyHighResolution
AX-168429897	Other
AX-168429898	Other
AX-168429899	CallRateBelowThreshold
AX-168429900	Other
AX-168429901	Other
AX-168429902	Other
AX-168429903	CallRateBelowThreshold
AX-168429904	Other
AX-168429905	Other
AX-168429907	PolyHighResolution
AX-168429908	Other
AX-168429909	CallRateBelowThreshold
AX-168429910	CallRateBelowThreshold
AX-168429911	Other
AX-168429912	OTV
AX-168429913	CallRateBelowThreshold
AX-168429914	PolyHighResolution
AX-168429915	NoMinorHom
AX-168429916	PolyHighResolution
AX-168429917	CallRateBelowThreshold
AX-168429919	NoMinorHom
AX-168429920	Other
AX-168429921	CallRateBelowThreshold
AX-168429923	PolyHighResolution
AX-168429924	CallRateBelowThreshold
AX-168429925	Other
AX-168429926	Other
AX-168429927	NoMinorHom
AX-168429928	NoMinorHom
AX-168429929	PolyHighResolution
AX-168429931	CallRateBelowThreshold
AX-168429932	CallRateBelowThreshold
AX-168429933	NoMinorHom
AX-168429934	NoMinorHom
AX-168429935	Other
AX-168429936	Other
AX-168429937	Other
AX-168429938	Other
AX-168429939	NoMinorHom
AX-168429940	Other
AX-168429941	Other
AX-168429942	CallRateBelowThreshold
AX-168429943	CallRateBelowThreshold
AX-168429944	PolyHighResolution
AX-168429945	PolyHighResolution
AX-168429950	CallRateBelowThreshold
AX-168429951	CallRateBelowThreshold
AX-168429952	NoMinorHom
AX-168429953	CallRateBelowThreshold
AX-168429954	Other
AX-168429955	Other
AX-168429956	PolyHighResolution
AX-168429957	PolyHighResolution
AX-168429958	PolyHighResolution
AX-168429961	CallRateBelowThreshold
AX-168429962	PolyHighResolution
AX-168429963	PolyHighResolution
AX-168429964	NoMinorHom
AX-168429965	CallRateBelowThreshold
AX-168429966	PolyHighResolution
AX-168429967	PolyHighResolution
AX-168429968	PolyHighResolution
AX-168429971	Other
AX-168429972	Other
AX-168429973	PolyHighResolution
AX-168429974	PolyHighResolution
AX-168429975	PolyHighResolution
AX-168429976	NoMinorHom
AX-168429977	NoMinorHom
AX-168429978	PolyHighResolution
AX-168429979	PolyHighResolution
AX-168429980	NoMinorHom
AX-168429981	PolyHighResolution
AX-168429982	Other
AX-168429983	CallRateBelowThreshold
AX-168429984	PolyHighResolution
AX-168429988	PolyHighResolution
AX-168429989	PolyHighResolution
AX-168429990	PolyHighResolution
AX-168429991	PolyHighResolution
AX-168429992	PolyHighResolution
AX-168429993	Other
AX-168429994	Other
AX-168429995	MonoHighResolution
AX-168429996	NoMinorHom
AX-168429999	NoMinorHom
AX-168430002	PolyHighResolution
AX-168430003	CallRateBelowThreshold
AX-168430004	Other
AX-168430005	PolyHighResolution
AX-168430006	PolyHighResolution
AX-168430007	PolyHighResolution
AX-168430008	PolyHighResolution
AX-168430009	PolyHighResolution
AX-168430010	NoMinorHom
AX-168430011	Other
AX-168430012	PolyHighResolution
AX-168430013	PolyHighResolution
AX-168430014	NoMinorHom
AX-168430015	NoMinorHom
AX-168430016	CallRateBelowThreshold
AX-168430017	PolyHighResolution
AX-168430018	CallRateBelowThreshold
AX-168430020	PolyHighResolution
AX-168430021	PolyHighResolution
AX-168430022	NoMinorHom
AX-168430023	Other
AX-168430024	PolyHighResolution
AX-168430025	PolyHighResolution
AX-168430026	PolyHighResolution
AX-168430027	CallRateBelowThreshold
AX-168430028	PolyHighResolution
AX-168430029	PolyHighResolution
AX-168430030	NoMinorHom
AX-168430031	Other
AX-168430033	PolyHighResolution
AX-168430034	PolyHighResolution
AX-168430035	PolyHighResolution
AX-168430036	NoMinorHom
AX-168430038	PolyHighResolution
AX-168430039	PolyHighResolution
AX-168430041	PolyHighResolution
AX-168430042	PolyHighResolution
AX-168430043	PolyHighResolution
AX-168430044	NoMinorHom
AX-168430045	PolyHighResolution
AX-168430046	Other
AX-168430047	PolyHighResolution
AX-168430048	PolyHighResolution
AX-168430049	PolyHighResolution
AX-168430050	PolyHighResolution
AX-168430051	PolyHighResolution
AX-168430052	PolyHighResolution
AX-168430053	PolyHighResolution
AX-168430054	NoMinorHom
AX-168430055	PolyHighResolution
AX-168430056	CallRateBelowThreshold
AX-168430057	CallRateBelowThreshold
AX-168430058	NoMinorHom
AX-168430059	PolyHighResolution
AX-168430060	NoMinorHom
AX-168430061	CallRateBelowThreshold
AX-168430062	NoMinorHom
AX-168430063	PolyHighResolution
AX-168430064	PolyHighResolution
AX-168430065	PolyHighResolution
AX-168430066	Other
AX-168430067	CallRateBelowThreshold
AX-168430068	Other
AX-168430069	PolyHighResolution
AX-168430070	Other
AX-168430071	OTV
AX-168430072	Other
AX-168430073	PolyHighResolution
AX-168430074	CallRateBelowThreshold
AX-168430075	PolyHighResolution
AX-168430076	Other
AX-168430077	PolyHighResolution
AX-168430078	CallRateBelowThreshold
AX-168430079	Other
AX-168430080	PolyHighResolution
AX-168430081	PolyHighResolution
AX-168430082	PolyHighResolution
AX-168430083	PolyHighResolution
AX-168430084	NoMinorHom
AX-168430085	Other
AX-168430086	Other
AX-168430087	MonoHighResolution
AX-168430088	PolyHighResolution
AX-168430089	PolyHighResolution
AX-168430090	PolyHighResolution
AX-168430091	PolyHighResolution
AX-168430092	NoMinorHom
AX-168430093	PolyHighResolution
AX-168430094	PolyHighResolution
AX-168430095	PolyHighResolution
AX-168430096	PolyHighResolution
AX-168430097	PolyHighResolution
AX-168430098	PolyHighResolution
AX-168430099	PolyHighResolution
AX-168430100	PolyHighResolution
AX-168430101	NoMinorHom
AX-168430102	Other
AX-168430103	PolyHighResolution
AX-168430104	PolyHighResolution
AX-168430106	PolyHighResolution
AX-168430107	PolyHighResolution
AX-168430108	CallRateBelowThreshold
AX-168430109	OTV
AX-168430111	PolyHighResolution
AX-168430113	Other
AX-168430114	PolyHighResolution
AX-168430115	NoMinorHom
AX-168430116	MonoHighResolution
AX-168430117	CallRateBelowThreshold
AX-168430118	NoMinorHom
AX-168430120	PolyHighResolution
AX-168430121	PolyHighResolution
AX-168430122	PolyHighResolution
AX-168430123	PolyHighResolution
AX-168430124	PolyHighResolution
AX-168430125	Other
AX-168430126	PolyHighResolution
AX-168430127	PolyHighResolution
AX-168430128	PolyHighResolution
AX-168430129	PolyHighResolution
AX-168430130	PolyHighResolution
AX-168430131	CallRateBelowThreshold
AX-168430132	PolyHighResolution
AX-168430133	PolyHighResolution
AX-168430134	PolyHighResolution
AX-168430135	Other
AX-168430136	CallRateBelowThreshold
AX-168430137	PolyHighResolution
AX-168430138	PolyHighResolution
AX-168430139	PolyHighResolution
AX-168430140	PolyHighResolution
AX-168430141	PolyHighResolution
AX-168430142	PolyHighResolution
AX-168430143	PolyHighResolution
AX-168430144	PolyHighResolution
AX-168430145	PolyHighResolution
AX-168430146	PolyHighResolution
AX-168430147	OTV
AX-168430148	NoMinorHom
AX-168430149	PolyHighResolution
AX-168430150	PolyHighResolution
AX-168430151	PolyHighResolution
AX-168430152	PolyHighResolution
AX-168430153	PolyHighResolution
AX-168430154	PolyHighResolution
AX-168430155	PolyHighResolution
AX-168430156	PolyHighResolution
AX-168430158	MonoHighResolution
AX-168430160	CallRateBelowThreshold
AX-168430161	Other
AX-168430162	PolyHighResolution
AX-168430164	PolyHighResolution
AX-168430166	PolyHighResolution
AX-168430167	PolyHighResolution
AX-168430168	PolyHighResolution
AX-168430169	PolyHighResolution
AX-168430170	NoMinorHom
AX-168430171	Other
AX-168430172	PolyHighResolution
AX-168430173	PolyHighResolution
AX-168430174	PolyHighResolution
AX-168430175	PolyHighResolution
AX-168430176	PolyHighResolution
AX-168430177	PolyHighResolution
AX-168430178	PolyHighResolution
AX-168430179	PolyHighResolution
AX-168430180	PolyHighResolution
AX-168430181	PolyHighResolution
AX-168430182	PolyHighResolution
AX-168430183	PolyHighResolution
AX-168430184	CallRateBelowThreshold
AX-168430185	PolyHighResolution
AX-168430186	PolyHighResolution
AX-168430187	PolyHighResolution
AX-168430188	PolyHighResolution
AX-168430189	Other
AX-168430191	PolyHighResolution
AX-168430192	NoMinorHom
AX-168430193	PolyHighResolution
AX-168430194	PolyHighResolution
AX-168430195	PolyHighResolution
AX-168430196	PolyHighResolution
AX-168430197	PolyHighResolution
AX-168430198	PolyHighResolution
AX-168430199	NoMinorHom
AX-168430200	PolyHighResolution
AX-168430201	Other
AX-168430202	NoMinorHom
AX-168430203	Other
AX-168430204	NoMinorHom
AX-168430205	NoMinorHom
AX-168430206	PolyHighResolution
AX-168430207	Other
AX-168430208	PolyHighResolution
AX-168430209	NoMinorHom
AX-168430210	PolyHighResolution
AX-168430211	Other
AX-168430212	CallRateBelowThreshold
AX-168430213	Other
AX-168430214	PolyHighResolution
AX-168430215	PolyHighResolution
AX-168430216	Other
AX-168430217	PolyHighResolution
AX-168430218	NoMinorHom
AX-168430219	PolyHighResolution
AX-168430220	PolyHighResolution
AX-168430221	PolyHighResolution
AX-168430222	PolyHighResolution
AX-168430223	PolyHighResolution
AX-168430224	PolyHighResolution
AX-168430225	PolyHighResolution
AX-168430226	NoMinorHom
AX-168430227	NoMinorHom
AX-168430228	PolyHighResolution
AX-168430229	NoMinorHom
AX-168430231	PolyHighResolution
AX-168430232	NoMinorHom
AX-168430233	PolyHighResolution
AX-168430235	PolyHighResolution
AX-168430236	PolyHighResolution
AX-168430237	CallRateBelowThreshold
AX-168430238	NoMinorHom
AX-168430239	MonoHighResolution
AX-168430240	PolyHighResolution
AX-168430241	PolyHighResolution
AX-168430242	NoMinorHom
AX-168430243	PolyHighResolution
AX-168430244	Other
AX-168430245	PolyHighResolution
AX-168430247	PolyHighResolution
AX-168430248	CallRateBelowThreshold
AX-168430249	PolyHighResolution
AX-168430250	Other
AX-168430252	NoMinorHom
AX-168430253	PolyHighResolution
AX-168430254	PolyHighResolution
AX-168430255	PolyHighResolution
AX-168430256	Other
AX-168430257	PolyHighResolution
AX-168430258	PolyHighResolution
AX-168430259	NoMinorHom
AX-168430260	NoMinorHom
AX-168430261	NoMinorHom
AX-168430262	NoMinorHom
AX-168430263	NoMinorHom
AX-168430264	Other
AX-168430266	CallRateBelowThreshold
AX-168430268	PolyHighResolution
AX-168430269	PolyHighResolution
AX-168430270	PolyHighResolution
AX-168430272	PolyHighResolution
AX-168430274	PolyHighResolution
AX-168430275	PolyHighResolution
AX-168430276	CallRateBelowThreshold
AX-168430277	PolyHighResolution
AX-168430278	Other
AX-168430279	Other
AX-168430282	MonoHighResolution
AX-168430283	PolyHighResolution
AX-168430284	PolyHighResolution
AX-168430285	PolyHighResolution
AX-168430286	Other
AX-168430287	CallRateBelowThreshold
AX-168430288	PolyHighResolution
AX-168430289	Other
AX-168430290	PolyHighResolution
AX-168430291	MonoHighResolution
AX-168430292	PolyHighResolution
AX-168430293	PolyHighResolution
AX-168430295	PolyHighResolution
AX-168430296	Other
AX-168430297	PolyHighResolution
AX-168430298	PolyHighResolution
AX-168430299	NoMinorHom
AX-168430301	PolyHighResolution
AX-168430303	PolyHighResolution
AX-168430304	NoMinorHom
AX-168430306	NoMinorHom
AX-168430307	Other
AX-168430308	PolyHighResolution
AX-168430309	NoMinorHom
AX-168430310	PolyHighResolution
AX-168430311	PolyHighResolution
AX-168430312	PolyHighResolution
AX-168430314	CallRateBelowThreshold
AX-168430315	PolyHighResolution
AX-168430316	PolyHighResolution
AX-168430317	Other
AX-168430318	CallRateBelowThreshold
AX-168430319	PolyHighResolution
AX-168430320	PolyHighResolution
AX-168430321	NoMinorHom
AX-168430322	Other
AX-168430323	PolyHighResolution
AX-168430324	PolyHighResolution
AX-168430325	PolyHighResolution
AX-168430326	NoMinorHom
AX-168430327	PolyHighResolution
AX-168430328	Other
AX-168430329	CallRateBelowThreshold
AX-168430330	Other
AX-168430331	PolyHighResolution
AX-168430332	PolyHighResolution
AX-168430333	Other
AX-168430334	Other
AX-168430335	Other
AX-168430336	Other
AX-168430337	Other
AX-168430339	PolyHighResolution
AX-168430340	CallRateBelowThreshold
AX-168430341	PolyHighResolution
AX-168430342	NoMinorHom
AX-168430344	PolyHighResolution
AX-168430346	CallRateBelowThreshold
AX-168430347	PolyHighResolution
AX-168430348	NoMinorHom
AX-168430350	NoMinorHom
AX-168430351	Other
AX-168430353	PolyHighResolution
AX-168430354	NoMinorHom
AX-168430355	NoMinorHom
AX-168430357	NoMinorHom
AX-168430358	PolyHighResolution
AX-168430359	Other
AX-168430360	PolyHighResolution
AX-168430361	PolyHighResolution
AX-168430362	PolyHighResolution
AX-168430363	PolyHighResolution
AX-168430364	PolyHighResolution
AX-168430366	NoMinorHom
AX-168430367	Other
AX-168430368	PolyHighResolution
AX-168430370	NoMinorHom
AX-168430371	NoMinorHom
AX-168430372	NoMinorHom
AX-168430373	PolyHighResolution
AX-168430374	PolyHighResolution
AX-168430375	PolyHighResolution
AX-168430378	CallRateBelowThreshold
AX-168430380	NoMinorHom
AX-168430381	MonoHighResolution
AX-168430382	Other
AX-168430384	PolyHighResolution
AX-168430385	PolyHighResolution
AX-168430386	NoMinorHom
AX-168430387	PolyHighResolution
AX-168430388	Other
AX-168430389	NoMinorHom
AX-168430390	NoMinorHom
AX-168430391	PolyHighResolution
AX-168430392	CallRateBelowThreshold
AX-168430393	NoMinorHom
AX-168430394	PolyHighResolution
AX-168430395	PolyHighResolution
AX-168430396	PolyHighResolution
AX-168430397	PolyHighResolution
AX-168430398	NoMinorHom
AX-168430399	NoMinorHom
AX-168430400	NoMinorHom
AX-168430401	CallRateBelowThreshold
AX-168430402	PolyHighResolution
AX-168430403	PolyHighResolution
AX-168430404	NoMinorHom
AX-168430405	PolyHighResolution
AX-168430406	NoMinorHom
AX-168430407	Other
AX-168430409	PolyHighResolution
AX-168430410	PolyHighResolution
AX-168430411	CallRateBelowThreshold
AX-168430412	PolyHighResolution
AX-168430414	Other
AX-168430415	PolyHighResolution
AX-168430416	PolyHighResolution
AX-168430417	PolyHighResolution
AX-168430418	PolyHighResolution
AX-168430419	Other
AX-168430420	PolyHighResolution
AX-168430421	PolyHighResolution
AX-168430422	PolyHighResolution
AX-168430423	PolyHighResolution
AX-168430424	PolyHighResolution
AX-168430425	PolyHighResolution
AX-168430426	PolyHighResolution
AX-168430428	Other
AX-168430429	PolyHighResolution
AX-168430430	CallRateBelowThreshold
AX-168430431	PolyHighResolution
AX-168430432	Other
AX-168430433	Other
AX-168430434	PolyHighResolution
AX-168430436	PolyHighResolution
AX-168430437	MonoHighResolution
AX-168430438	PolyHighResolution
AX-168430439	PolyHighResolution
AX-168430440	CallRateBelowThreshold
AX-168430441	CallRateBelowThreshold
AX-168430442	OTV
AX-168430443	NoMinorHom
AX-168430444	CallRateBelowThreshold
AX-168430446	NoMinorHom
AX-168430447	Other
AX-168430448	Other
AX-168430449	Other
AX-168430450	PolyHighResolution
AX-168430451	PolyHighResolution
AX-168430452	PolyHighResolution
AX-168430453	PolyHighResolution
AX-168430454	PolyHighResolution
AX-168430455	PolyHighResolution
AX-168430456	NoMinorHom
AX-168430460	PolyHighResolution
AX-168430461	PolyHighResolution
AX-168430462	Other
AX-168430463	PolyHighResolution
AX-168430464	CallRateBelowThreshold
AX-168430465	Other
AX-168430466	Other
AX-168430467	PolyHighResolution
AX-168430468	NoMinorHom
AX-168430469	Other
AX-168430470	NoMinorHom
AX-168430471	PolyHighResolution
AX-168430472	NoMinorHom
AX-168430473	CallRateBelowThreshold
AX-168430474	PolyHighResolution
AX-168430476	NoMinorHom
AX-168430478	PolyHighResolution
AX-168430480	CallRateBelowThreshold
AX-168430481	PolyHighResolution
AX-168430482	PolyHighResolution
AX-168430484	CallRateBelowThreshold
AX-168430486	Other
AX-168430487	OTV
AX-168430488	MonoHighResolution
AX-168430489	PolyHighResolution
AX-168430490	PolyHighResolution
AX-168430492	PolyHighResolution
AX-168430493	PolyHighResolution
AX-168430494	PolyHighResolution
AX-168430495	NoMinorHom
AX-168430496	NoMinorHom
AX-168430497	PolyHighResolution
AX-168430498	PolyHighResolution
AX-168430499	NoMinorHom
AX-168430500	CallRateBelowThreshold
AX-168430501	PolyHighResolution
AX-168430502	PolyHighResolution
AX-168430503	PolyHighResolution
AX-168430504	PolyHighResolution
AX-168430505	NoMinorHom
AX-168430507	PolyHighResolution
AX-168430509	PolyHighResolution
AX-168430510	PolyHighResolution
AX-168430511	NoMinorHom
AX-168430513	MonoHighResolution
AX-168430514	Other
AX-168430515	NoMinorHom
AX-168430517	Other
AX-168430518	NoMinorHom
AX-168430519	Other
AX-168430520	PolyHighResolution
AX-168430521	CallRateBelowThreshold
AX-168430522	CallRateBelowThreshold
AX-168430523	PolyHighResolution
AX-168430524	Other
AX-168430527	PolyHighResolution
AX-168430528	Other
AX-168430529	NoMinorHom
AX-168430530	PolyHighResolution
AX-168430531	Other
AX-168430532	Other
AX-168430534	NoMinorHom
AX-168430535	PolyHighResolution
AX-168430536	PolyHighResolution
AX-168430537	PolyHighResolution
AX-168430538	NoMinorHom
AX-168430539	PolyHighResolution
AX-168430540	PolyHighResolution
AX-168430541	PolyHighResolution
AX-168430542	Other
AX-168430543	PolyHighResolution
AX-168430544	PolyHighResolution
AX-168430545	Other
AX-168430546	PolyHighResolution
AX-168430547	PolyHighResolution
AX-168430548	PolyHighResolution
AX-168430549	Other
AX-168430550	NoMinorHom
AX-168430551	PolyHighResolution
AX-168430552	PolyHighResolution
AX-168430553	PolyHighResolution
AX-168430554	Other
AX-168430555	PolyHighResolution
AX-168430556	PolyHighResolution
AX-168430557	PolyHighResolution
AX-168430558	Other
AX-168430560	Other
AX-168430561	PolyHighResolution
AX-168430562	PolyHighResolution
AX-168430563	NoMinorHom
AX-168430564	OTV
AX-168430565	PolyHighResolution
AX-168430566	NoMinorHom
AX-168430567	PolyHighResolution
AX-168430569	MonoHighResolution
AX-168430571	PolyHighResolution
AX-168430573	PolyHighResolution
AX-168430574	PolyHighResolution
AX-168430575	NoMinorHom
AX-168430576	NoMinorHom
AX-168430579	PolyHighResolution
AX-168430580	PolyHighResolution
AX-168430581	NoMinorHom
AX-168430582	PolyHighResolution
AX-168430584	PolyHighResolution
AX-168430585	PolyHighResolution
AX-168430586	Other
AX-168430587	CallRateBelowThreshold
AX-168430588	PolyHighResolution
AX-168430589	PolyHighResolution
AX-168430590	CallRateBelowThreshold
AX-168430591	PolyHighResolution
AX-168430592	PolyHighResolution
AX-168430593	CallRateBelowThreshold
AX-168430594	PolyHighResolution
AX-168430596	Other
AX-168430597	PolyHighResolution
AX-168430598	PolyHighResolution
AX-168430599	OTV
AX-168430600	NoMinorHom
AX-168430601	PolyHighResolution
AX-168430602	PolyHighResolution
AX-168430604	PolyHighResolution
AX-168430605	CallRateBelowThreshold
AX-168430606	Other
AX-168430607	CallRateBelowThreshold
AX-168430608	PolyHighResolution
AX-168430609	NoMinorHom
AX-168430611	PolyHighResolution
AX-168430612	PolyHighResolution
AX-168430613	CallRateBelowThreshold
AX-168430614	CallRateBelowThreshold
AX-168430615	Other
AX-168430616	PolyHighResolution
AX-168430617	Other
AX-168430618	PolyHighResolution
AX-168430619	PolyHighResolution
AX-168430620	PolyHighResolution
AX-168430621	PolyHighResolution
AX-168430622	PolyHighResolution
AX-168430623	PolyHighResolution
AX-168430625	PolyHighResolution
AX-168430626	PolyHighResolution
AX-168430627	PolyHighResolution
AX-168430628	PolyHighResolution
AX-168430630	NoMinorHom
AX-168430631	PolyHighResolution
AX-168430633	PolyHighResolution
AX-168430634	PolyHighResolution
AX-168430635	PolyHighResolution
AX-168430637	PolyHighResolution
AX-168430638	PolyHighResolution
AX-168430640	PolyHighResolution
AX-168430641	PolyHighResolution
AX-168430642	PolyHighResolution
AX-168430644	PolyHighResolution
AX-168430645	PolyHighResolution
AX-168430646	PolyHighResolution
AX-168430647	PolyHighResolution
AX-168430648	PolyHighResolution
AX-168430649	CallRateBelowThreshold
AX-168430650	PolyHighResolution
AX-168430651	PolyHighResolution
AX-168430652	PolyHighResolution
AX-168430653	PolyHighResolution
AX-168430654	PolyHighResolution
AX-168430655	PolyHighResolution
AX-168430656	PolyHighResolution
AX-168430657	PolyHighResolution
AX-168430658	CallRateBelowThreshold
AX-168430659	PolyHighResolution
AX-168430660	PolyHighResolution
AX-168430661	NoMinorHom
AX-168430662	PolyHighResolution
AX-168430663	PolyHighResolution
AX-168430664	PolyHighResolution
AX-168430665	CallRateBelowThreshold
AX-168430666	NoMinorHom
AX-168430667	PolyHighResolution
AX-168430668	PolyHighResolution
AX-168430669	PolyHighResolution
AX-168430670	PolyHighResolution
AX-168430671	PolyHighResolution
AX-168430672	PolyHighResolution
AX-168430673	PolyHighResolution
AX-168430674	NoMinorHom
AX-168430675	PolyHighResolution
AX-168430677	PolyHighResolution
AX-168430678	NoMinorHom
AX-168430679	NoMinorHom
AX-168430680	PolyHighResolution
AX-168430681	PolyHighResolution
AX-168430682	PolyHighResolution
AX-168430683	NoMinorHom
AX-168430684	PolyHighResolution
AX-168430685	NoMinorHom
AX-168430686	NoMinorHom
AX-168430687	NoMinorHom
AX-168430688	PolyHighResolution
AX-168430689	PolyHighResolution
AX-168430690	NoMinorHom
AX-168430691	NoMinorHom
AX-168430693	NoMinorHom
AX-168430694	NoMinorHom
AX-168430695	PolyHighResolution
AX-168430696	OTV
AX-168430697	Other
AX-168430698	PolyHighResolution
AX-168430699	NoMinorHom
AX-168430700	Other
AX-168430701	NoMinorHom
AX-168430702	PolyHighResolution
AX-168430703	OTV
AX-168430704	PolyHighResolution
AX-168430706	PolyHighResolution
AX-168430707	PolyHighResolution
AX-168430708	PolyHighResolution
AX-168430709	CallRateBelowThreshold
AX-168430710	NoMinorHom
AX-168430712	PolyHighResolution
AX-168430713	Other
AX-168430714	PolyHighResolution
AX-168430716	PolyHighResolution
AX-168430717	Other
AX-168430718	CallRateBelowThreshold
AX-168430719	Other
AX-168430720	Other
AX-168430721	Other
AX-168430724	PolyHighResolution
AX-168430725	PolyHighResolution
AX-168430726	PolyHighResolution
AX-168430727	PolyHighResolution
AX-168430728	CallRateBelowThreshold
AX-168430729	CallRateBelowThreshold
AX-168430730	PolyHighResolution
AX-168430731	NoMinorHom
AX-168430732	PolyHighResolution
AX-168430733	PolyHighResolution
AX-168430736	PolyHighResolution
AX-168430737	PolyHighResolution
AX-168430738	NoMinorHom
AX-168430739	PolyHighResolution
AX-168430740	PolyHighResolution
AX-168430742	Other
AX-168430743	PolyHighResolution
AX-168430744	PolyHighResolution
AX-168430745	PolyHighResolution
AX-168430746	PolyHighResolution
AX-168430748	PolyHighResolution
AX-168430749	PolyHighResolution
AX-168430750	PolyHighResolution
AX-168430751	PolyHighResolution
AX-168430752	PolyHighResolution
AX-168430753	PolyHighResolution
AX-168430754	Other
AX-168430755	CallRateBelowThreshold
AX-168430756	PolyHighResolution
AX-168430757	CallRateBelowThreshold
AX-168430759	PolyHighResolution
AX-168430760	PolyHighResolution
AX-168430761	PolyHighResolution
AX-168430762	PolyHighResolution
AX-168430763	NoMinorHom
AX-168430764	NoMinorHom
AX-168430765	PolyHighResolution
AX-168430766	PolyHighResolution
AX-168430767	PolyHighResolution
AX-168430768	PolyHighResolution
AX-168430769	PolyHighResolution
AX-168430770	NoMinorHom
AX-168430771	PolyHighResolution
AX-168430772	PolyHighResolution
AX-168430773	PolyHighResolution
AX-168430774	PolyHighResolution
AX-168430775	CallRateBelowThreshold
AX-168430776	Other
AX-168430777	PolyHighResolution
AX-168430778	NoMinorHom
AX-168430779	PolyHighResolution
AX-168430780	PolyHighResolution
AX-168430782	Other
AX-168430783	PolyHighResolution
AX-168430784	CallRateBelowThreshold
AX-168430785	PolyHighResolution
AX-168430786	PolyHighResolution
AX-168430787	PolyHighResolution
AX-168430789	PolyHighResolution
AX-168430790	CallRateBelowThreshold
AX-168430792	PolyHighResolution
AX-168430793	PolyHighResolution
AX-168430794	CallRateBelowThreshold
AX-168430795	NoMinorHom
AX-168430796	PolyHighResolution
AX-168430797	Other
AX-168430798	PolyHighResolution
AX-168430799	NoMinorHom
AX-168430800	PolyHighResolution
AX-168430801	PolyHighResolution
AX-168430802	PolyHighResolution
AX-168430803	PolyHighResolution
AX-168430804	PolyHighResolution
AX-168430805	PolyHighResolution
AX-168430806	Other
AX-168430807	Other
AX-168430808	OTV
AX-168430809	Other
AX-168430810	PolyHighResolution
AX-168430811	NoMinorHom
AX-168430812	PolyHighResolution
AX-168430813	NoMinorHom
AX-168430814	PolyHighResolution
AX-168430816	NoMinorHom
AX-168430817	PolyHighResolution
AX-168430818	PolyHighResolution
AX-168430819	PolyHighResolution
AX-168430821	PolyHighResolution
AX-168430822	NoMinorHom
AX-168430823	PolyHighResolution
AX-168430824	PolyHighResolution
AX-168430825	PolyHighResolution
AX-168430826	PolyHighResolution
AX-168430827	CallRateBelowThreshold
AX-168430828	PolyHighResolution
AX-168430829	PolyHighResolution
AX-168430830	PolyHighResolution
AX-168430831	PolyHighResolution
AX-168430832	PolyHighResolution
AX-168430833	PolyHighResolution
AX-168430834	NoMinorHom
AX-168430835	PolyHighResolution
AX-168430836	PolyHighResolution
AX-168430837	PolyHighResolution
AX-168430838	NoMinorHom
AX-168430839	PolyHighResolution
AX-168430840	PolyHighResolution
AX-168430841	PolyHighResolution
AX-168430842	PolyHighResolution
AX-168430843	CallRateBelowThreshold
AX-168430844	PolyHighResolution
AX-168430846	PolyHighResolution
AX-168430848	OTV
AX-168430849	CallRateBelowThreshold
AX-168430850	PolyHighResolution
AX-168430851	PolyHighResolution
AX-168430855	NoMinorHom
AX-168430856	Other
AX-168430857	NoMinorHom
AX-168430858	CallRateBelowThreshold
AX-168430859	PolyHighResolution
AX-168430860	PolyHighResolution
AX-168430861	PolyHighResolution
AX-168430862	OTV
AX-168430863	PolyHighResolution
AX-168430864	PolyHighResolution
AX-168430866	NoMinorHom
AX-168430867	Other
AX-168430868	PolyHighResolution
AX-168430869	Other
AX-168430870	PolyHighResolution
AX-168430871	PolyHighResolution
AX-168430872	PolyHighResolution
AX-168430873	PolyHighResolution
AX-168430874	NoMinorHom
AX-168430875	PolyHighResolution
AX-168430876	PolyHighResolution
AX-168430877	CallRateBelowThreshold
AX-168430878	PolyHighResolution
AX-168430879	PolyHighResolution
AX-168430880	CallRateBelowThreshold
AX-168430881	Other
AX-168430882	PolyHighResolution
AX-168430883	PolyHighResolution
AX-168430884	NoMinorHom
AX-168430885	PolyHighResolution
AX-168430886	Other
AX-168430887	CallRateBelowThreshold
AX-168430888	PolyHighResolution
AX-168430889	PolyHighResolution
AX-168430890	PolyHighResolution
AX-168430891	PolyHighResolution
AX-168430892	CallRateBelowThreshold
AX-168430893	PolyHighResolution
AX-168430894	PolyHighResolution
AX-168430895	PolyHighResolution
AX-168430896	PolyHighResolution
AX-168430897	PolyHighResolution
AX-168430898	PolyHighResolution
AX-168430899	PolyHighResolution
AX-168430900	Other
AX-168430901	PolyHighResolution
AX-168430903	PolyHighResolution
AX-168430904	PolyHighResolution
AX-168430905	PolyHighResolution
AX-168430906	PolyHighResolution
AX-168430907	PolyHighResolution
AX-168430908	PolyHighResolution
AX-168430909	NoMinorHom
AX-168430910	NoMinorHom
AX-168430911	NoMinorHom
AX-168430912	NoMinorHom
AX-168430913	PolyHighResolution
AX-168430915	PolyHighResolution
AX-168430916	Other
AX-168430917	NoMinorHom
AX-168430918	NoMinorHom
AX-168430919	PolyHighResolution
AX-168430920	NoMinorHom
AX-168430921	PolyHighResolution
AX-168430922	NoMinorHom
AX-168430923	PolyHighResolution
AX-168430924	NoMinorHom
AX-168430926	PolyHighResolution
AX-168430928	PolyHighResolution
AX-168430929	PolyHighResolution
AX-168430930	NoMinorHom
AX-168430931	PolyHighResolution
AX-168430932	PolyHighResolution
AX-168430933	NoMinorHom
AX-168430935	NoMinorHom
AX-168430936	PolyHighResolution
AX-168430937	NoMinorHom
AX-168430938	PolyHighResolution
AX-168430939	PolyHighResolution
AX-168430940	PolyHighResolution
AX-168430941	Other
AX-168430942	CallRateBelowThreshold
[truncated: 190,790 more rows]
